# Supplementary material
Source: PubMed Central journal article supplement (PMC4062578)
Supplement: NIHMS588111-supplement-01.pdf [file NIHMS588111-supplement-01.pdf]

## Supporting Information

### 3D $^{15}\text{N}/^{15}\text{N}/^1\text{H}$ Chemical Shift Correlation Experiment Utilizing an RFDR-based $^1\text{H}/^1\text{H}$ Mixing Period at 100 kHz MAS

Yusuke Nishiyama<sup>1</sup>, Michal Malon,<sup>1</sup> Yuji Ishii,<sup>1</sup> and Ayyalusamy Ramamoorthy<sup>2\*</sup>

<sup>1</sup>JEOL RESONANCE Inc., Musashino, Akishima, Tokyo 196-8558, Japan

<sup>2</sup>Biophysics and Department of Chemistry, University of Michigan, Ann Arbor, Michigan 48109-1055, USA

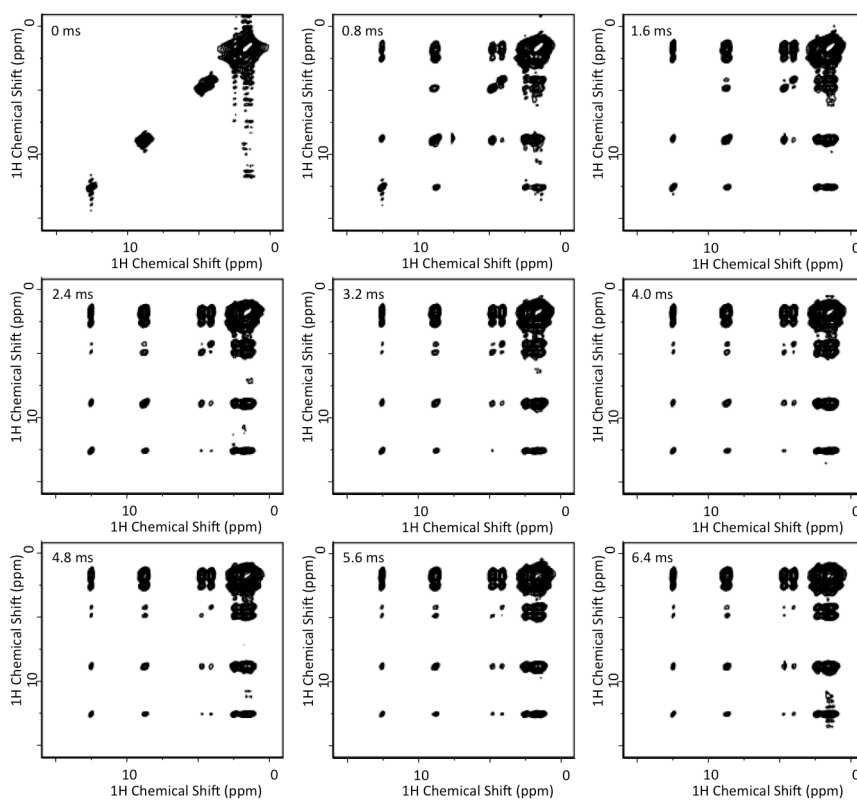

**Figure S1.** 2D  $^1\text{H}/^1\text{H}$  chemical shift correlation spectra of NAVL powder sample obtained using the pulse sequence given in Figure 1(A) at the indicated RFDR mixing times; all other conditions are as explained in the main text.

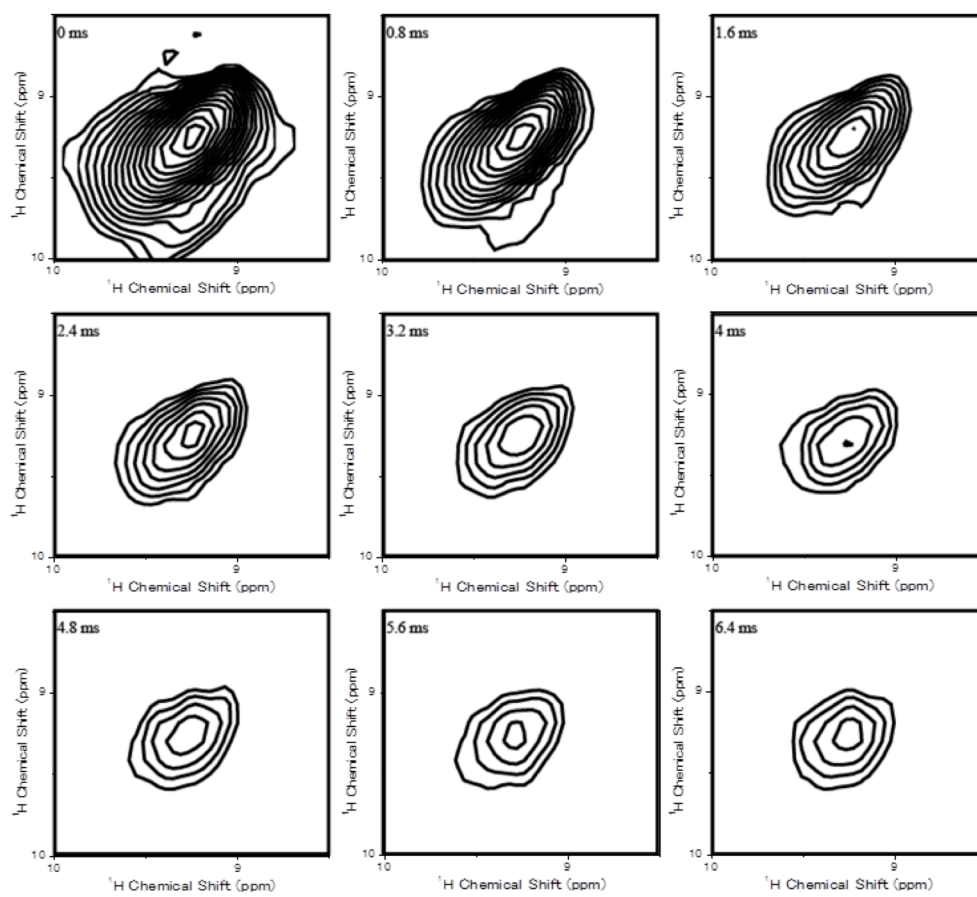

**Figure S2.** Expanded amide-<sup>1</sup>H chemical shift region of 2D spectra given in Figure S1.

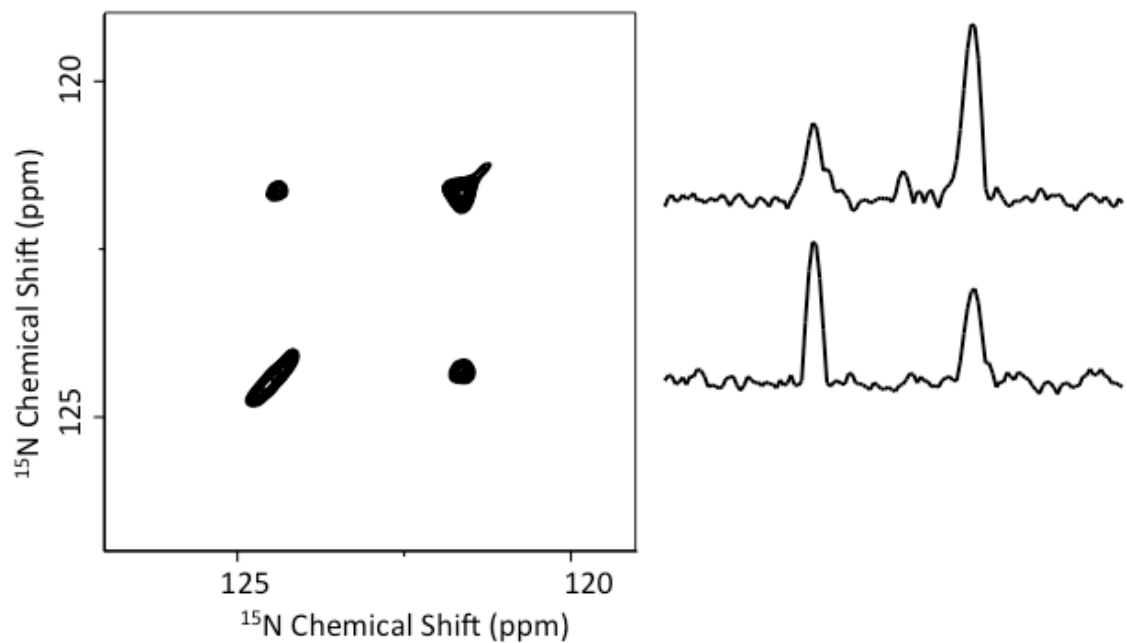

**Figure S3.** Proton-detected 2D  $^{15}\text{N}/^{15}\text{N}$  chemical shift correlation spectrum of NAVL powder sample obtained with a 3.2 ms RFDR mixing in the  $^1\text{H}$  channel using the 3D  $^{15}\text{N}/^{15}\text{N}/^1\text{H}$  pulse sequence given in Figure 1(C) and  $\text{XY4}^{1_4}$  phase cycling at 70 kHz MAS. 16  $t_1$  and 16  $t_2$  points were observed with a recycle delay of 2 s. The measurement time was 4.6 hour. The 2D spectrum is a project of the 3D  $^{15}\text{N}/^{15}\text{N}/^1\text{H}$  spectrum on to the  $^{15}\text{N}/^{15}\text{N}$  plane. 1D spectral slices extracted from the 2D  $^{15}\text{N}/^{15}\text{N}$  spectrum are shown (right). A contact time of 1 ms was used for all the CP transfers.
